# Supplementary material for: Identification of structural features of surface modifiers in engineered nanostructured metal oxides regarding cell uptake through ML-based classification
Source: publisher site journal article supplement (doi:10.3762/bjnano.15.75), 2024-07-22
Supplement: Additional file 1 [file 2190-4286-15-75-S1.pdf]

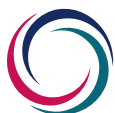

## Supporting Information

for

### **Identification of structural features of surface modifiers in engineered nanostructured metal oxides regarding cell uptake through ML-based classification**

Indrasis Dasgupta, Totan Das, Biplab Das and Shovanlal Gayen

*Beilstein J. Nanotechnol.* **2024**, *15*, 909–924. [doi:10.3762/bjnano.15.75](https://doi.org/10.3762/bjnano.15.75)

## Additional figures and tables

**Table S1:** Dataset of 109 surface modifiers of magnetofluorescent ENMOs (monocrystalline magnetic nanoparticle having overall size of 38 nm)

| No. | Smiles notation of the surface modifiers                                    | PaCa2 <sup>a</sup> |        | HUVEC <sup>b</sup> |        | U937 <sup>c</sup> |        |
|-----|-----------------------------------------------------------------------------|--------------------|--------|--------------------|--------|-------------------|--------|
|     |                                                                             | log10 [ENMO]/cell  | Binary | log10 [ENMO]/cell  | Binary | log10 [ENMO]/cell | Binary |
| 1   | C(C(=O)OC(=O)C(F)(F)F)(F)F                                                  | 4.17               | 1      | 4.40               | 1      | 3.04              | 1      |
| 2   | FC(F)(Cl)C(=O)OC(=O)C(F)(F)Cl                                               | 3.95               | 1      | 4.08               | 1      | 3.01              | 1      |
| 3*  | C(C(F)(F)F)(C(=O)OC(=O)C(C(F)(F)F)(F)F)                                     | 4.08               | 1      | 4.53               | 1      | 2.96              | 0      |
| 4   | CC1(C)CC(=O)OC1=O                                                           | 4.11               | 1      | 3.94               | 1      | 2.96              | 0      |
| 5*  | O1C(=O)C=CC1=O                                                              | 3.98               | 1      | 4.00               | 1      | 3.02              | 1      |
| 6   | O1C(=O)C(=CC1=O)C                                                           | 3.58               | 0      | 4.04               | 1      | 3.11              | 1      |
| 7   | O1C(=O)C(=C(C1=O)C)C                                                        | 3.48               | 0      | 4.63               | 1      | 2.98              | 1      |
| 8   | C(CCCCC)C(=O)OC(=O)CCCCC                                                    | 3.65               | 1      | 3.91               | 1      | 3.01              | 1      |
| 9   | C1(=O)OC(=O)[C@@H](C1)C                                                     | 3.64               | 0      | 3.17               | 0      | 3.00              | 1      |
| 10* | C(=O)([C@@H]1C[C@H]2C(=O)OC(=O)[C@@H]2CC1)[C@H]1C[C@H]2C(=O)OC(=O)[C@H]2CC1 | 3.51               | 0      | 4.67               | 1      | 3.00              | 1      |
| 11  | C1(=O)OC(=O)[C@@H]2C[C@H](CC[C@@H]12)[N+](O)[O-]                            | 3.27               | 0      | 4.57               | 1      | 3.02              | 1      |
| 12  | Brc1ccc2C(=O)OC(=O)c3ccccc1c23                                              | 3.63               | 0      | 4.03               | 1      | 3.07              | 1      |
| 13* | O=C1OC(=O)c2ccc3C(=O)OC(=O)c4ccc1c2c34                                      | 3.67               | 1      | 3.21               | 0      | 2.95              | 0      |
| 14  | C1(=O)OC(=O)[C@H]2[C@H]([C@@H]([C@H]([C@@H]2)F)F)F                          | 3.83               | 1      | 4.39               | 1      | 3.00              | 1      |
| 15  | O=C1OC(=O)c2cc(cc3ccccc1c23)N(O)O                                           | 4.11               | 1      | 3.22               | 0      | 3.08              | 1      |
| 16  | C1(=O)OC(=O)[C@@H]2[C@@H](CC[C@H]12)O                                       | 3.97               | 1      | 3.25               | 0      | 2.96              | 0      |
| 17  | O=C1OC(=O)[C@@H]2[C@H]3CC[C@H](C=C3)[C@H]12                                 | 3.9                | 1      | 4.54               | 1      | 3.01              | 1      |
| 18  | [C@@H]12NC(=O)OC(=O)[C@@H]1C[C@@H](CC2)Cl                                   | 4.18               | 1      | 2.88               | 0      | 3.07              | 1      |
| 19* | [C@@H]12S(=O)(=O)OC(=O)[C@@H]1CCCC2                                         | 3.88               | 1      | 4.40               | 1      | 2.98              | 1      |
| 20  | O1C(=O)C(=C(C1=O)Cl)Cl                                                      | 3.84               | 1      | 4.47               | 1      | 3.01              | 1      |
| 21  | CC(=O)S[C@@H]1C(=O)OC(=O)C1                                                 | 3.59               | 0      | 3.75               | 1      | 3.02              | 1      |
| 22  | C1(=O)OC(=O)[C@@H]2C[C@H]([C@@H](C[C@@H]12)Cl)Cl                            | 4.12               | 1      | 4.48               | 1      | 3.00              | 1      |
| 23  | O=C1OC(=O)[C@H]2[C@H]3O[C@H](C=C3)[C@@H]12                                  | 3.82               | 1      | 4.11               | 1      | 2.98              | 1      |
| 24  | O=C1OC(=O)[C@H]2[C@@H]3C=C[C@H]([C@@H]12)[C@@H]1[C@H]3C(=O)OC1=O            | 3.63               | 0      | 4.35               | 1      | 3.00              | 1      |
| 25  | C1(=O)OC(=O)[C@H]2CC=CC[C@@H]12                                             | 3.89               | 1      | 3.76               | 1      | 3.03              | 1      |
| 26* | O1C(=O)[C@H]2[C@H](CCCC2)[C@@H]2[C@H](C1=O)CCCC2                            | 3.77               | 1      | 4.70               | 1      | 2.99              | 1      |
| 27  | O=C1OC(=O)c2ccc(c3ccccc1c23)N(O)O                                           | 3.93               | 1      | 3.34               | 0      | 3.08              | 1      |
| 28  | O=C1OC(=O)[C@H]2[C@@H]1[C@H]1[C@@H]2C(=O)OC1=O                              | 3.77               | 1      | 3.82               | 1      | 3.07              | 1      |
| 29  | CCCCCCCCCCCC(=O)OC(=O)CCCCCCCC                                              | 3.82               | 1      | 4.52               | 1      | 3.02              | 1      |

|     |                                                                           |      |   |      |   |      |   |
|-----|---------------------------------------------------------------------------|------|---|------|---|------|---|
| 30  | <chem>C1(=O)OC(=O)[C@@H]2C[C@H](CC[C@H]12)C(=O)O</chem>                   | 3.55 | 0 | 4.21 | 1 | 3.05 | 1 |
| 31  | <chem>C1(=O)OC(=O)[C@@H]2C[C@H](CC[C@H]12)C</chem>                        | 3.98 | 1 | 4.30 | 1 | 3.02 | 1 |
| 32  | <chem>C1(=O)OC(=O)[C@H]2[C@@H](CCC[C@@H]12)[N+](O)[O-]</chem>             | 3.5  | 0 | 4.45 | 1 | 2.96 | 0 |
| 33  | <chem>C1(=O)OC(=O)C[C@H]2CCCC[C@@H]12</chem>                              | 3.78 | 1 | 4.18 | 1 | 2.96 | 0 |
| 34  | <chem>O1C(=O)CCCC1=O</chem>                                               | 4.07 | 1 | 3.41 | 0 | 3.00 | 1 |
| 35  | <chem>C(CN1CC(=O)OC(=O)C1)N1CC(=O)OC(=O)C1</chem>                         | 3.93 | 1 | 4.00 | 1 | 2.94 | 0 |
| 36  | <chem>[C@H]12NC(=O)OC(=O)[C@@H]1CC2</chem>                                | 4.44 | 1 | 3.59 | 0 | 3.12 | 1 |
| 37  | <chem>[C@@H]12N(C(=O)OC(=O)[C@@H]1CCCC2)C</chem>                          | 3.36 | 0 | 2.15 | 0 | 2.85 | 0 |
| 38  | <chem>O1C(=O)CC(CC1=O)C</chem>                                            | 3.91 | 1 | 3.06 | 0 | 2.98 | 1 |
| 39  | <chem>C1(=O)OC(=O)C2=C1CCCC2</chem>                                       | 3.73 | 1 | 4.57 | 1 | 3.00 | 1 |
| 40* | <chem>CC(=O)O[C@@H]1[C@@H](OC(=O)C)C(=O)OC1=O</chem>                      | 3.91 | 1 | 4.58 | 1 | 3.04 | 1 |
| 41* | <chem>C1(=O)OC(=O)[C@H]2[C@@H]([C@H]([C@@H]([C@H]12)Br)Br)Br)Br</chem>    | 3.8  | 1 | 4.57 | 1 | 3.07 | 1 |
| 42  | <chem>O=C1OC(=O)[C@H]2CCCC[C@H]12</chem>                                  | 3.93 | 1 | 3.29 | 0 | 2.99 | 1 |
| 43  | <chem>O1C(=O)C2=C(C1=O)CCC2</chem>                                        | 3.69 | 1 | 4.31 | 1 | 3.02 | 1 |
| 44* | <chem>C(C(=O)OC(=O)CI)I</chem>                                            | 3.42 | 0 | 4.24 | 1 | 2.80 | 0 |
| 45  | <chem>C(C(=O)OC(=O)CCI)Cl</chem>                                          | 3.63 | 0 | 4.56 | 1 | 2.99 | 1 |
| 46  | <chem>ClC1=C(Cl)[C@@]2(Cl)[C@H]3[C@H](C(=O)OC3=O)[C@]1(Cl)C2(Cl)Cl</chem> | 3.47 | 0 | 4.60 | 1 | 2.96 | 0 |
| 47* | <chem>CCCCCCCCCCCCCCCC(=O)OC(=O)CCCCCCCCCCCC</chem>                       | 3.55 | 0 | 4.68 | 1 | 2.97 | 0 |
| 48  | <chem>Nc1ccc2C(=O)OC(=O)c3cccc1c23</chem>                                 | 3.64 | 0 | 4.64 | 1 | 2.97 | 0 |
| 49  | <chem>C(CCCCCCCC)C(=O)OC(=O)CCCCCCC</chem>                                | 4.03 | 1 | 4.73 | 1 | 3.12 | 1 |
| 50  | <chem>C1CCCC21CC(=O)OC(=O)C2</chem>                                       | 4.06 | 1 | 3.71 | 0 | 3.09 | 1 |
| 51  | <chem>O=C1OC(=O)[C@@H]2[C@H]3C=C[C@H]1(C3)[C@H]12</chem>                  | 3.94 | 1 | 4.37 | 1 | 3.01 | 1 |
| 52* | <chem>O=C1OC(=O)c2cccc3cccc1c23</chem>                                    | 3.96 | 1 | 4.09 | 1 | 3.04 | 1 |
| 53  | <chem>O1C(=O)[C@@H](CCCC1=O)C1CCCC1</chem>                                | 4.02 | 1 | 3.90 | 1 | 3.02 | 1 |
| 54  | <chem>C1(=O)OC(=O)[C@@H]2[C@H]([C@@H]([C@@H]([C@H]12)Cl)Cl)Cl)Cl</chem>   | 3.83 | 1 | 4.76 | 1 | 3.04 | 1 |
| 55  | <chem>C1(=O)OC(=O)[C@H]2[C@@H](CC[C@@H]12)Cl)Cl</chem>                    | 3.9  | 1 | 4.70 | 1 | 2.95 | 0 |
| 56  | <chem>O1C(=O)C(CCC1=O)(C)C</chem>                                         | 3.94 | 1 | 3.28 | 0 | 2.97 | 0 |
| 57  | <chem>C(CCCC)N</chem>                                                     | 3.78 | 1 | 3.31 | 0 | 2.95 | 0 |
| 58  | <chem>C[C@H](CC(C)C)N</chem>                                              | 3.85 | 1 | 4.14 | 1 | 3.03 | 1 |
| 59  | <chem>[C@H]1([C@H]([C@@H]([C@H]1)C[C@@H]1CO)O)N)O)O</chem>                | 3.36 | 0 | 3.28 | 0 | 2.89 | 0 |
| 60* | <chem>C(CCCCC)N</chem>                                                    | 3.75 | 1 | 3.34 | 0 | 3.00 | 1 |
| 61  | <chem>CC(C)(N)C</chem>                                                    | 3.86 | 1 | 3.34 | 0 | 2.97 | 0 |
| 62  | <chem>C(C(C)C)N</chem>                                                    | 3.72 | 1 | 3.08 | 0 | 2.92 | 0 |
| 63  | <chem>[C@H](C(C)C)(N)C</chem>                                             | 3.75 | 1 | 2.97 | 0 | 2.88 | 0 |

|     |                                               |      |   |      |   |      |   |
|-----|-----------------------------------------------|------|---|------|---|------|---|
| 64  | C(CC(C)C)N                                    | 3.83 | 1 | 3.19 | 0 | 2.94 | 0 |
| 65  | CCC(CC)N                                      | 3.81 | 1 | 3.32 | 0 | 3.03 | 1 |
| 66  | CC(CC)(N)C                                    | 4.07 | 1 | 3.91 | 1 | 3.02 | 1 |
| 67  | C(CN)N                                        | 3.46 | 0 | 3.08 | 0 | 2.91 | 0 |
| 68  | C(CCCCCCCCCCCCC)N                             | 4.06 | 1 | 3.49 | 0 | 3.26 | 1 |
| 69  | C(CCN)N                                       | 3.49 | 0 | 2.96 | 0 | 2.73 | 0 |
| 70  | C(CCCN)N                                      | 3.48 | 0 | 3.09 | 0 | 2.93 | 0 |
| 71  | C(CCCCCN)N                                    | 3.62 | 0 | 3.05 | 0 | 2.93 | 0 |
| 72  | C([C@H](CCCC)CC)N                             | 3.95 | 1 | 3.30 | 0 | 3.28 | 1 |
| 73  | C(CCCCCCCCCCCCC)N                             | 3.97 | 1 | 3.27 | 0 | 3.07 | 1 |
| 74  | C([C@H](CCCC)N                                | 3.63 | 0 | 2.97 | 0 | 2.89 | 0 |
| 75* | C(CCCCCCCCCCCCC)N                             | 4.27 | 1 | 3.55 | 0 | 3.44 | 1 |
| 76  | C(CN)NCCN                                     | 3.77 | 1 | 3.41 | 0 | 2.73 | 0 |
| 77  | NC[C@@]12C[C@@H]3C[C@@H](C[C@@H](C3)C1)C2     | 2.84 | 0 | 3.38 | 0 | 3.09 | 1 |
| 78  | [C@@H]1([C@H](C[C@H](CC1)CCN)O)O              | 2.53 | 0 | 2.96 | 0 | 2.92 | 0 |
| 79  | [C@@H]1(CC[C@H](CC1)CCN)O                     | 2.77 | 0 | 3.32 | 0 | 2.77 | 0 |
| 80  | C(CCCNCCCN)NCCCN                              | 2.41 | 0 | 3.35 | 0 | 2.57 | 0 |
| 81* | C(CCNCN)NCCN                                  | 2.23 | 0 | 3.37 | 0 | 2.75 | 0 |
| 82* | C(CNCCNCCNCCN)N                               | 2.54 | 0 | 3.21 | 0 | 2.73 | 0 |
| 83  | N[C@@]12C[C@@H]3C[C@@H](C[C@@H]1C3)C2         | 3.12 | 0 | 3.25 | 0 | 2.80 | 0 |
| 84* | N[C@@H]1[C@H]2C[C@@H]3C[C@H](C2)C[C@H]1C3     | 3.18 | 0 | 3.31 | 0 | 2.93 | 0 |
| 85* | C(C(=O)O)N                                    | 2.57 | 0 | 3.44 | 0 | 2.73 | 0 |
| 86  | [C@@H](CC1CCCC1)(C(=O)OC)N                    | 3.39 | 0 | 3.22 | 0 | 3.40 | 1 |
| 87  | [C@@H](CO)(C(=O)O)N                           | 3.36 | 0 | 3.07 | 0 | 3.06 | 1 |
| 88  | [C@@H]([C@@H](C)O)(C(=O)O)N                   | 3.21 | 0 | 2.85 | 0 | 3.00 | 1 |
| 89* | [C@@H](C[C@@H]1CN[C@H]2[C@@H]1CCCC2)(C(=O)O)N | 3.19 | 0 | 3.11 | 0 | 3.25 | 1 |
| 90  | [C@@H](C[C@H]1CC[C@@H](CC1)O)(C(=O)O)N        | 3.07 | 0 | 2.93 | 0 | 2.95 | 0 |
| 91  | [C@@H](C(C)C)(C(=O)O)N                        | 3.27 | 0 | 3.02 | 0 | 3.08 | 1 |
| 92  | NCCCC[C@H](N)C(=O)O                           | 3.25 | 0 | 3.58 | 0 | 2.69 | 0 |
| 93  | [C@H](C(=O)O)([C@@H]1CC[C@@H](CC1)C1)N        | 3.06 | 0 | 3.74 | 0 | 2.96 | 0 |
| 94  | C[C@H](N)C(=O)O                               | 2.9  | 0 | 3.30 | 0 | 2.81 | 0 |
| 95* | [C@@H](CCCNC(=N)N)(C(=O)O)N                   | 3.15 | 0 | 3.37 | 0 | 2.93 | 0 |
| 96* | [C@@H](CC(=O)O)(C(=O)O)N                      | 3.29 | 0 | 3.77 | 1 | 3.03 | 1 |
| 97  | [C@@H](CCC(=O)N)(C(=O)O)N                     | 3.32 | 0 | 3.66 | 0 | 2.99 | 1 |
| 98  | N[C@@H](CCC(=O)O)C(=O)O                       | 3.4  | 0 | 3.12 | 0 | 2.83 | 0 |
| 99  | [C@@H](C[C@@H]1NCNC1)(C(=O)O)N                | 3.38 | 0 | 3.01 | 0 | 3.02 | 1 |
| 100 | [C@@H](CCSC)(C(=O)O)N                         | 3.23 | 0 | 3.12 | 0 | 2.97 | 0 |
| 101 | [C@@H](CC1CCCC1)(C(=O)O)N                     | 3.29 | 0 | 3.10 | 0 | 3.12 | 1 |
| 102 | O=C1CCC(=O)O1                                 | 4.24 | 1 | 3.76 | 1 | 3.03 | 1 |

|      |                                                               |      |   |      |   |      |   |
|------|---------------------------------------------------------------|------|---|------|---|------|---|
| 103  | <chem>CC(=O)OC(=O)C</chem>                                    | 4.05 | 1 | 3.99 | 1 | 3.01 | 1 |
| 104  | <chem>C=C1CC(=O)OC1=O</chem>                                  | 4.04 | 1 | 4.43 | 1 | 2.92 | 0 |
| 105  | <chem>O1C(=O)COCC1=O</chem>                                   | 3.99 | 1 | 4.23 | 1 | 2.98 | 0 |
| 106  | <chem>C1(=O)OC(=O)[C@@H]2CCCC[C@H]12</chem>                   | 3.9  | 1 | 4.39 | 1 | 2.93 | 0 |
| 107  | <chem>C(C(=O)O)[C@H]1C(=O)OC(=O)C1</chem>                     | 4.03 | 1 | 4.64 | 1 | 3.02 | 1 |
| 108  | <chem>C1(=O)OC(=O)[C@H]2[C@@H](CC[C@H]([C@H]12)F)F</chem>     | 3.91 | 1 | 4.31 | 1 | 2.94 | 0 |
| 109* | <chem>C(C(=O)O)N(CCN1CC(=O)OC(=O)C1)CCN1CC(=O)OC(=O)C1</chem> | 4.1  | 1 | 4.26 | 1 | 2.98 | 1 |

\*' indicates Test Set compounds, <sup>a</sup>log<sub>10</sub> [MNP]/cell > 3.646 is assigned as 1 and log<sub>10</sub> [MNP]/cell < 3.646 is assigned as 0, <sup>b</sup>log<sub>10</sub> [MNP]/cell > 3.758 is assigned as 1 and log<sub>10</sub> [MNP]/cell < 3.758 is assigned as 0, <sup>c</sup>log<sub>10</sub> [MNP]/cell > 2.985 is assigned as 1 and log<sub>10</sub> [MNP]/cell < 2.985 is assigned as 0.

**Table S2:** Descriptors identified in the study for the cellular uptake of the engineered nano metal oxides (ENMOs) in the PaCa2 (human pancreatic ductal adenocarcinoma cells) cell line.

| <b>Name of the descriptors</b> | <b>Description</b>                                                                                                                             |
|--------------------------------|------------------------------------------------------------------------------------------------------------------------------------------------|
| nHBDon_Lipinski                | Number of hydrogen bond donors (using Lipinski's definition: Any OH or NH. Each available hydrogen atom is counted as one hydrogen bond donor) |
| AATS7i                         | Average Broto-Moreau autocorrelation - lag 7 / weighted by first ionization potential                                                          |
| minHsNH2                       | Minimum atom-type H E-State: -NH2                                                                                                              |
| maxsNH2                        | Maximum atom-type E-State: -NH2                                                                                                                |
| maxHBint3                      | Maximum E-State descriptors of strength for potential Hydrogen Bonds of path length 3                                                          |
| maxHBd                         | Maximum E-States for (strong) Hydrogen Bond donors                                                                                             |
| minHBint3                      | Minimum E-State descriptors of strength for potential Hydrogen Bonds of path length 3                                                          |
| maxHsOH                        | Maximum atom-type H E-State: -OH                                                                                                               |
| maxssO                         | Maximum atom-type E-State: -O-                                                                                                                 |
| minsOH                         | Minimum atom-type E-State: -OH                                                                                                                 |

**Table S3:** Descriptors identified in the study for the cellular uptake of the engineered nano metal oxides (ENMOs) in the HUVEC (human umbilical vein endothelial cells) cell line.

| <b>Name of the descriptors</b> | <b>Description</b>                                        |
|--------------------------------|-----------------------------------------------------------|
| ndssC                          | <i>Count of atom-type E-State: =C&lt;</i>                 |
| maxHBd                         | <i>Maximum E-States for (strong) Hydrogen Bond donors</i> |
| SsNH2                          | <i>Sum of atom-type E-State: -NH2</i>                     |
| maxssO                         | <i>Maximum atom-type E-State: -O-</i>                     |
| maxsNH2                        | <i>Maximum atom-type E-State: -NH2</i>                    |
| SRW9                           | <i>Self-returning walk count of order 9</i>               |
| nssO                           | <i>Count of atom-type E-State: -O-</i>                    |
| minHsNH2                       | <i>Minimum atom-type H E-State: -NH2</i>                  |

**Table S4:** Descriptors identified in the study for the cellular uptake of the engineered nano metal oxides (ENMOs) in the U937 (human monocyte lymphoma) cell line.

| <b>Name of the descriptors</b> | <b>Description</b>                                                                                                                                    |
|--------------------------------|-------------------------------------------------------------------------------------------------------------------------------------------------------|
| SsNH2                          | <i>Sum of atom-type E-State: -NH2</i>                                                                                                                 |
| SHsNH2                         | <i>Sum of atom-type H E-State: -NH2</i>                                                                                                               |
| maxsNH2                        | <i>Maximum atom-type E-State: -NH2</i>                                                                                                                |
| minHsNH2                       | <i>Minimum atom-type H E-State: -NH2</i>                                                                                                              |
| ETA_dEpsilon_D                 | <i>A measure of contribution of hydrogen bond donor atoms</i>                                                                                         |
| maxssO                         | <i>Maximum atom-type E-State: -O-</i>                                                                                                                 |
| maxHBd                         | <i>Maximum E-States for (strong) Hydrogen Bond donors</i>                                                                                             |
| maxdO                          | <i>Maximum atom-type E-State: =O</i>                                                                                                                  |
| ndO                            | <i>Count of atom-type E-State: =O</i>                                                                                                                 |
| ndssC                          | <i>Count of atom-type E-State: =C&lt;</i>                                                                                                             |
| nHBDon_Lipinski                | <i>Number of hydrogen bond donors (using Lipinski's definition: Any OH or NH. Each available hydrogen atom is counted as one hydrogen bond donor)</i> |

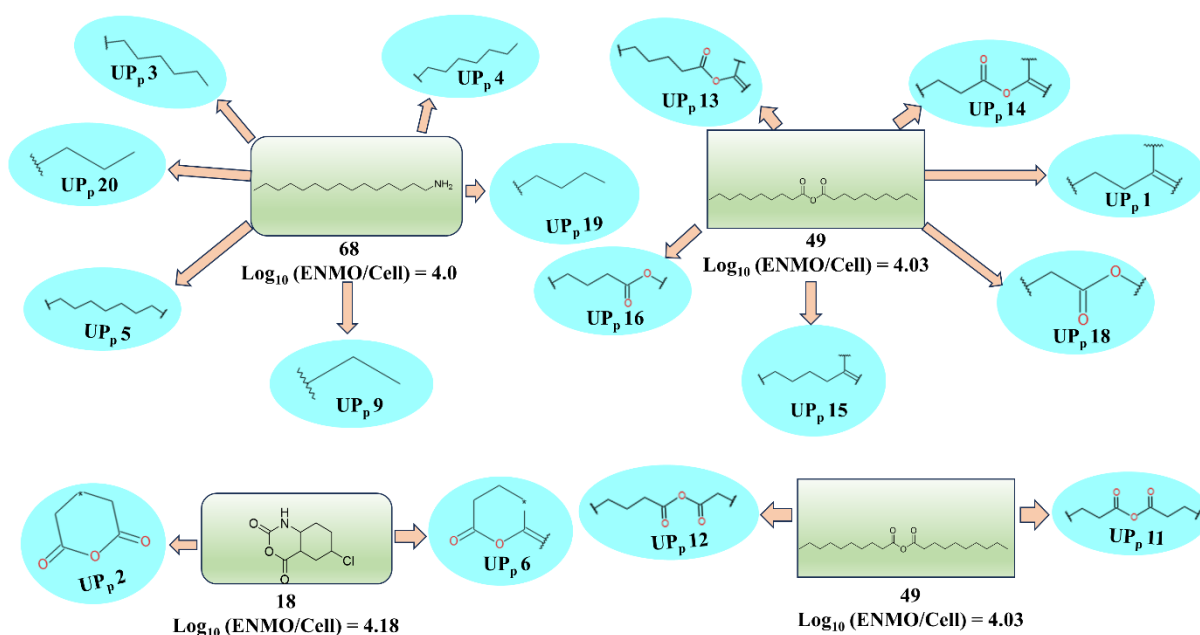

**Figure S1:** Structures of various surface modifiers (18, 49 and 68) from the dataset containing uptake-promoting fingerprints (PaCa2 cell line).

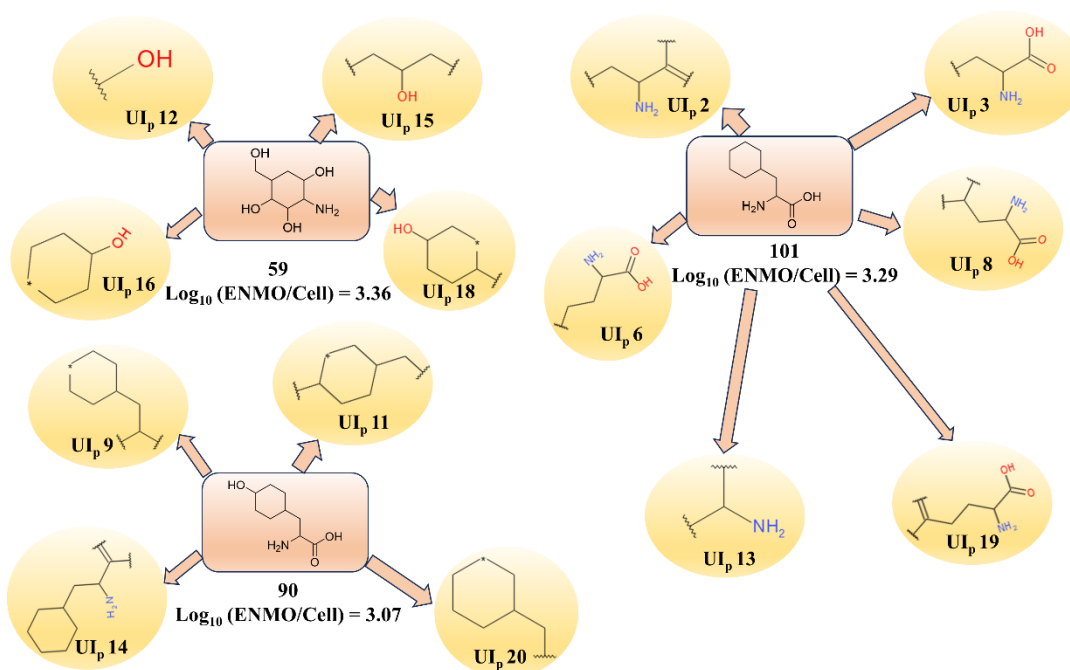

**Figure S2:** Structures of various surface modifiers (59, 90 and 101) from the dataset containing uptake-impairing fingerprints (PaCa2 cell line).



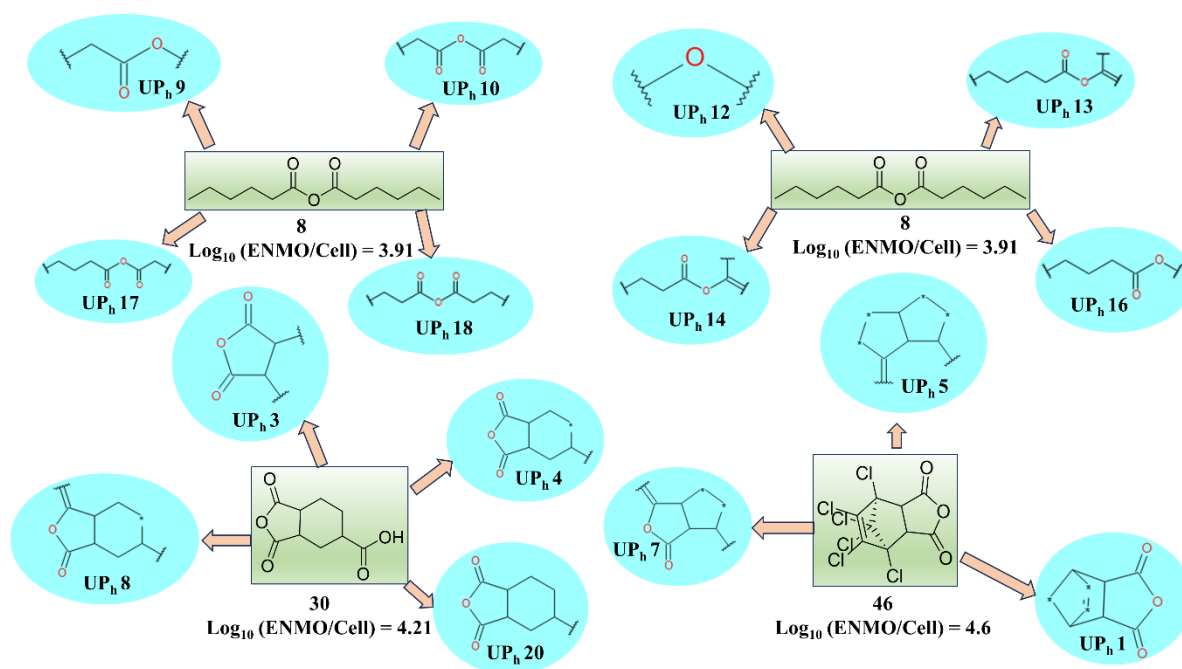

**Figure S3:** Structures of various surface modifiers (**8**, **30** and **46**) from the dataset containing uptake-promoting fingerprints (HUVEC cell line).

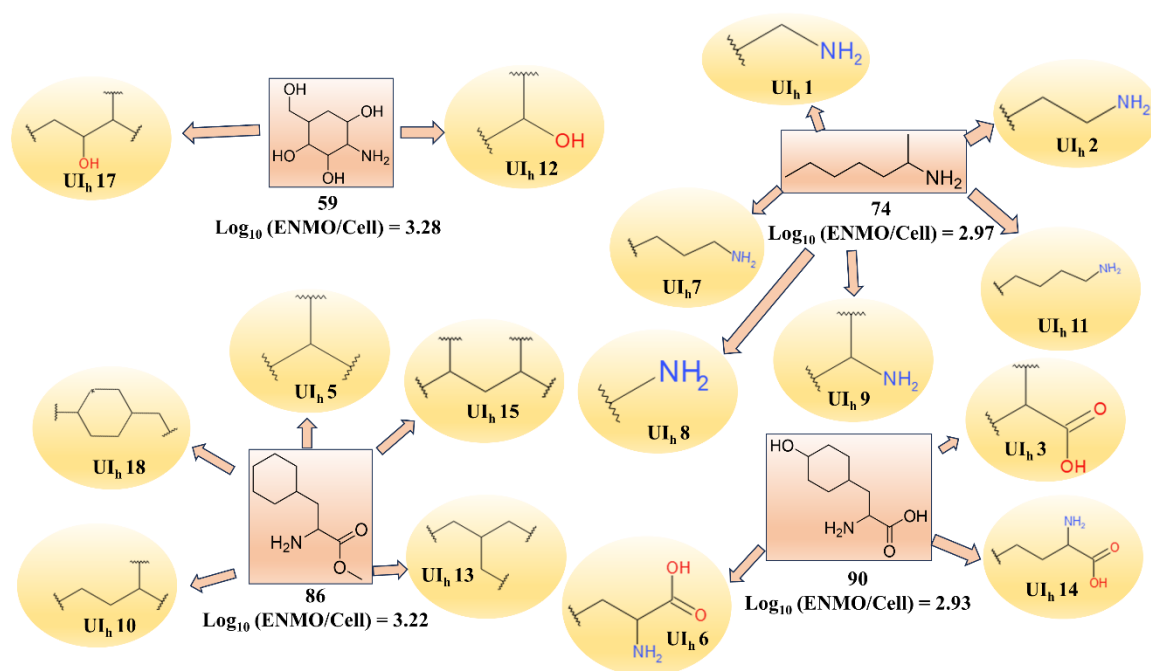

**Figure S4:** Structures of various surface modifiers (**59**, **74**, **86** and **90**) from the dataset containing uptake-impairing fingerprints (HUVEC cell line).

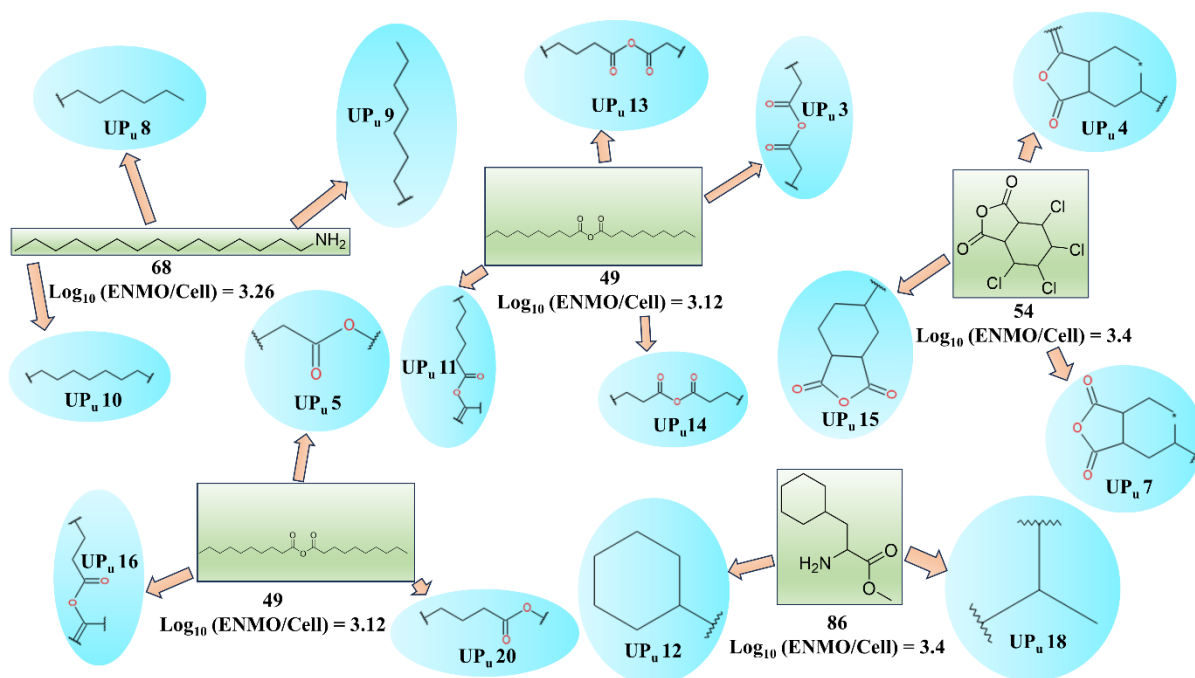

**Figure S5:** Structures of various surface modifiers (49, 54, 68 and 86) from the dataset containing uptake-promoting fingerprints (U937 cell line).

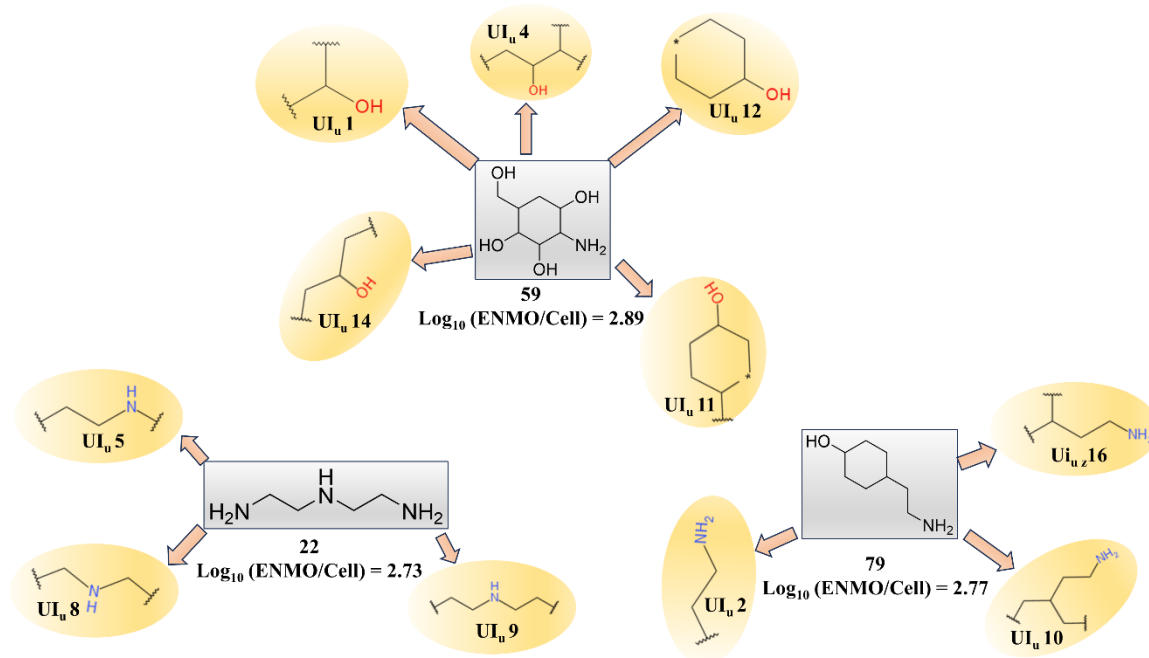

**Figure S6:** Structures of various surface modifiers (22, 59 and 79) from the dataset containing uptake-impairing fingerprints (U937 cell line).

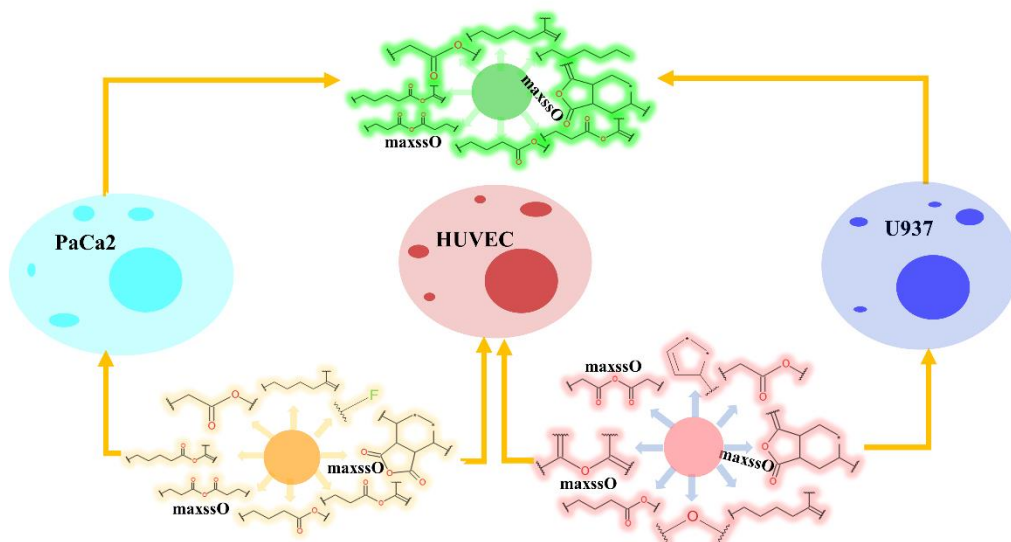

**Figure S7:** Correlation of common fingerprints obtained from Bayesian and machine learning studies with the three different cell lines (PaCa2, HUVEC, and U937).

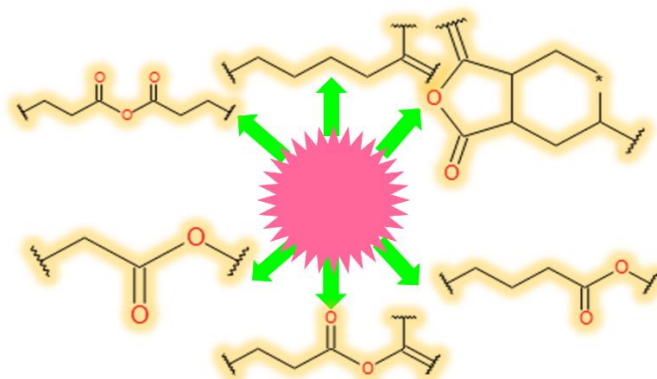

**Figure S8:** Common fingerprints were obtained from Bayesian classification for the three different cell lines (PaCa2, HUVEC, and U937).
